# Supplementary material for: The Investigation of Giardiasis (Foodborne and Waterborne Diseases) in Buffaloes in Van Region, Türkiye: First Molecular Report of Giardia duodenalis Assemblage B from Buffaloes
Source: MDPI journal article supplement (doi:10.3390/pathogens12010106), 2023-01-08
Supplement: s1 [file s1]

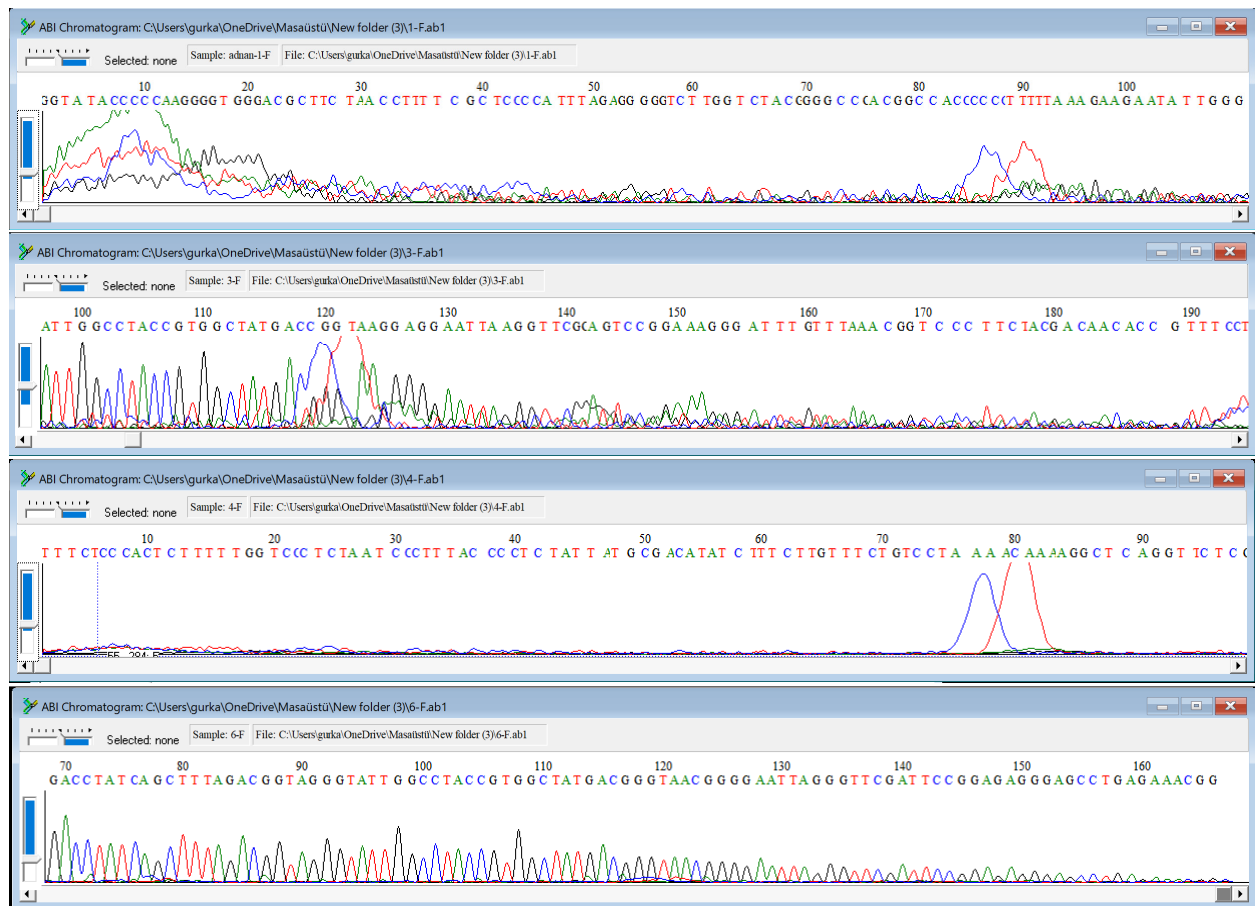

**Figure S1.** Distorted sequence results All samples were sequenced by sanger dideoxy sequencing; However, it is not given in the article in order not to give an incorrect result due to the early termination of sequencing in some of the 7 positive samples whose results were not given. You can see the sequence graphs of a few examples with no results below and understand why we didn't include them in the article.

**Table S1.** Model test results used in the interpretation of sequence analyzes.

| Model    | #Parameters | BIC         | AICc        | lnL              |
|----------|-------------|-------------|-------------|------------------|
| TN93+G   | 63          | 2823,198578 | 2368,495149 | - 1120,849785    |
| TN93+I   | 63          | 2825,743868 | 2371,04044  | -1122,12243      |
| TN93+G+I | 64          | 2828,459772 | 2366,551538 | -1118,86531      |
| T92+G    | 60          | 2838,870625 | 2405,78401  | - 1142,531022    |
| T92+G+I  | 61          | 2843,903501 | 2403,610882 | -<br>1140,432389 |
| K2+G     | 59          | 2844,000435 | 2418,120223 | - 1149,710999    |
| GTR+G    | 66          | 2845,330788 | 2369,014142 | -<br>1118,070675 |
| K2+G+I   | 60          | 2851,302285 | 2418,21567  | - 1148,746852    |
| HKY+G    | 62          | 2851,347203 | 2403,84898  | - 1139,539169    |
| GTR+I    | 66          | 2851,737851 | 2375,421205 | - 1121,274206    |
| GTR+G+I  | 67          | 2852,345143 | 2368,824891 | -<br>1116,962781 |
| HKY+G+I  | 63          | 2852,726711 | 2398,023282 | - 1135,613851    |

|        |    |             |             |                  |
|--------|----|-------------|-------------|------------------|
| JC+G   | 58 | 2888,08524  | 2469,41183  | -<br>1176,368473 |
| K2+I   | 59 | 2890,097187 | 2464,216974 | - 1172,759375    |
| T92+I  | 60 | 2891,760784 | 2458,674169 | - 1168,976102    |
| JC+G+I | 59 | 2896,119695 | 2470,239483 | - 1175,770629    |
| TN93   | 62 | 2908,042506 | 2460,544283 | -1167,88682      |
|        |    |             |             |                  |
| HKY+I  | 62 | 2911,718464 | 2464,220241 | - 1169,724799    |
| K2     | 58 | 2931,145971 | 2512,472562 | -<br>1197,898839 |
| JC+I   | 58 | 2931,510787 | 2512,837377 | - 1198,081246    |
| GTR    | 65 | 2932,529356 | 2463,416716 | - 1166,285031    |
| T92    | 59 | 2936,019918 | 2510,139706 | - 1195,720741    |
| HKY    | 61 | 2959,525923 | 2519,233304 | -1198,2436       |
| JC     | 57 | 2971,556836 | 2560,090627 | - 1222,719342    |
